# Supplementary material for: A simple and cost-efficient route to prepare sulfonated dihalo-monomers for synthesizing sulfonated aromatic PEMs
Source: Royal Society of Chemistry journal article supplement (doi:10.1039/d4ra06283c), 2024-01-01
Supplement: d4ra06283c1.pdf [file d4ra06283c1.pdf]

## Supplementary Information

### A simple and cost-efficient route to sulfonated dihalo monomers: building blocks for sulfonated aromatic PEMs

Nodar Dumbadze,<sup>a</sup> Marco Viviani,<sup>b</sup> Klaus-Dieter Kreuer<sup>b,c</sup> and Giorgi Titvinidze<sup>\*a,b</sup>

<sup>a</sup> Agricultural University of Georgia, 240 David Aghmashenebeli Alley, Tbilisi 0159, Georgia.

[g.titvinidze@agruni.edu.ge](mailto:g.titvinidze@agruni.edu.ge)

<sup>b</sup> Hahn-Schickard Gesellschaft für Angewandte Forschung e.V, Georges-Koehler-Allee, 103, 79110, Freiburg im Breisgau, Germany.

<sup>c</sup> Max-Planck-Institute for Solid State Research, Heisenbergstraße 1, 70569 Stuttgart, Germany.

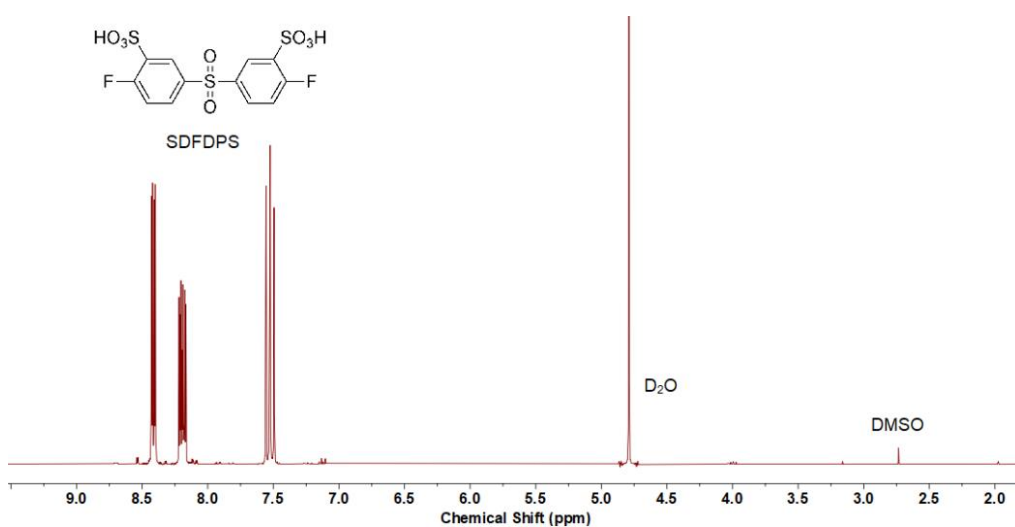

Fig. S 1 <sup>1</sup>H-NMR in D<sub>2</sub>O showing DMSO contamination of sDFDPS

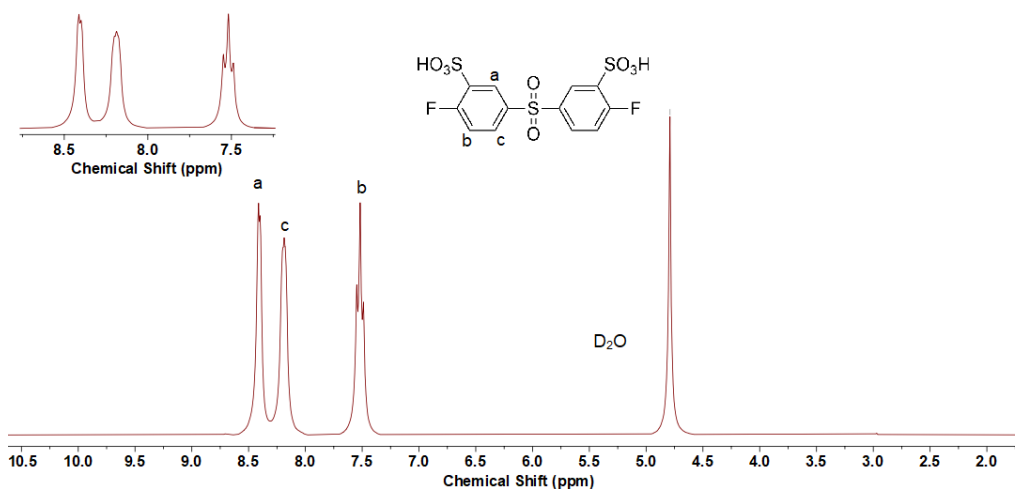

Fig. S 2 <sup>1</sup>H-NMR in D<sub>2</sub>O of pure sDFDPS (1) showing absence of DMSO and related proton multiplets

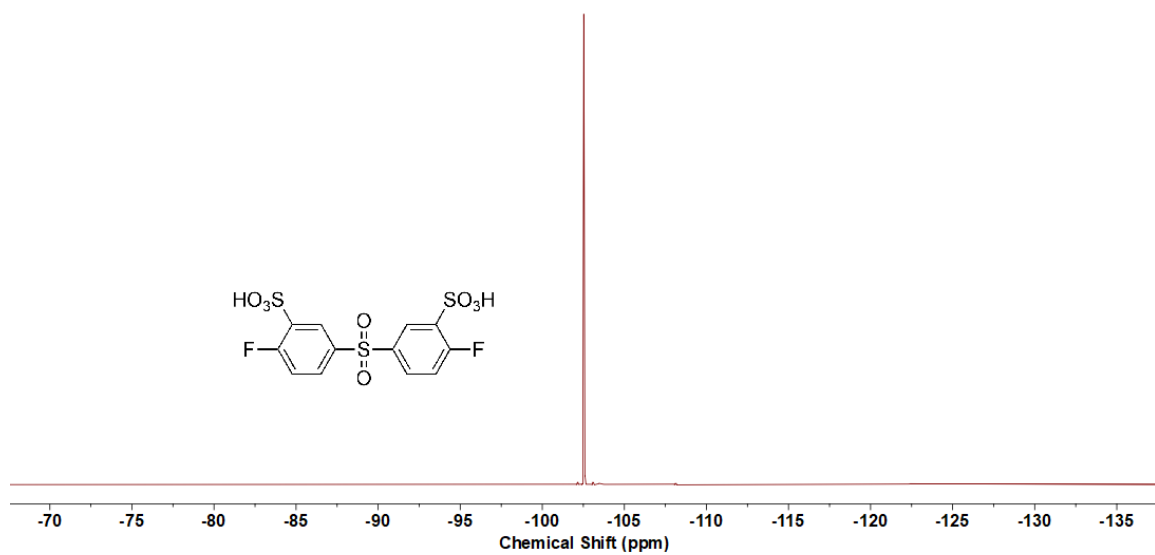

Fig. S 3  $^{19}\text{F}$  NMR in  $\text{D}_2\text{O}$  of pure sFDPS (1)

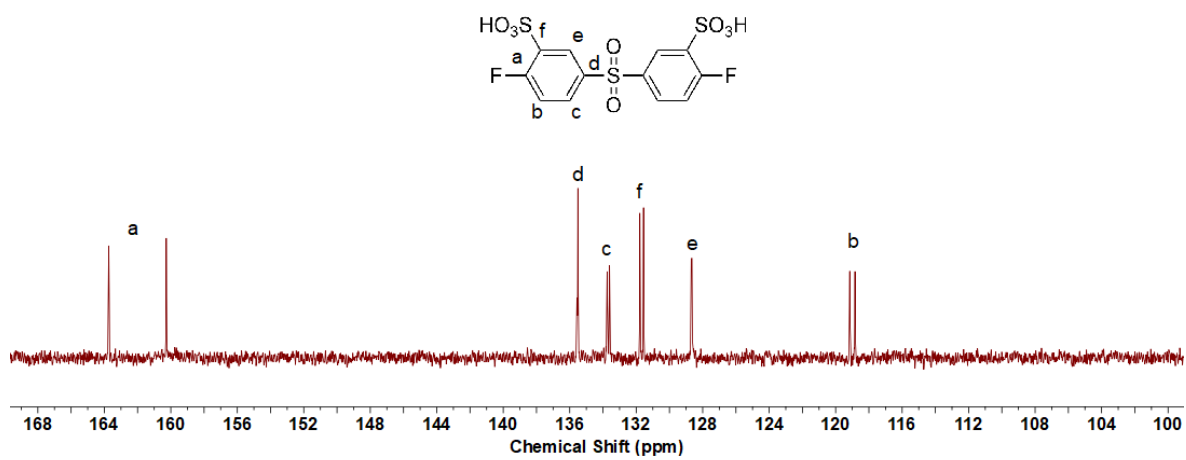

Fig. S 4  $^{13}\text{C}$ -NMR in  $\text{D}_2\text{O}$  of pure sFDPS (1)

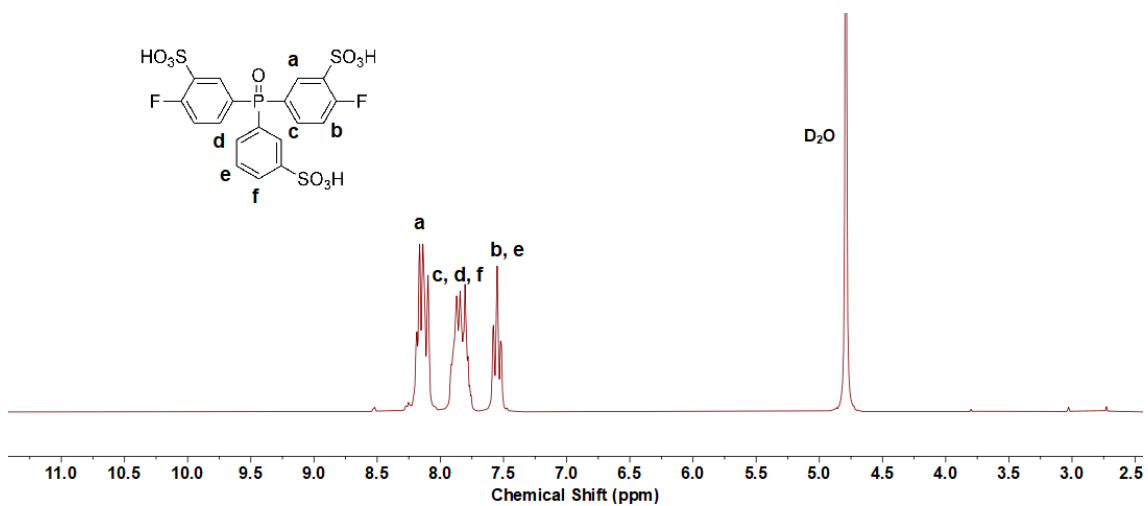

Fig. S 5 <sup>1</sup>H-NMR of sBFPPPO (2) in D<sub>2</sub>O

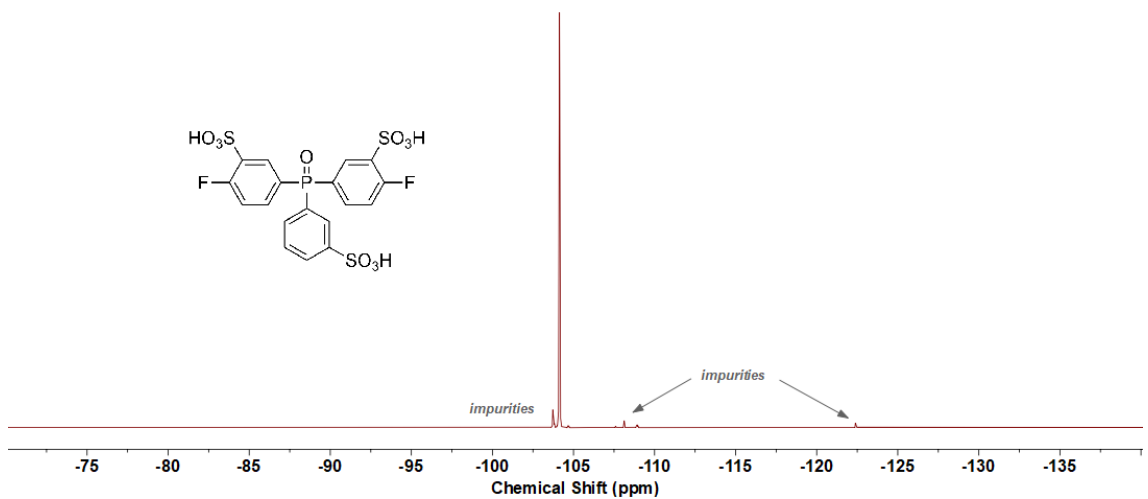

Fig. S 6 <sup>19</sup>F-NMR of sBFPPPO (2) in D<sub>2</sub>O showing the presence of traces impurities (ca. 2% mol)

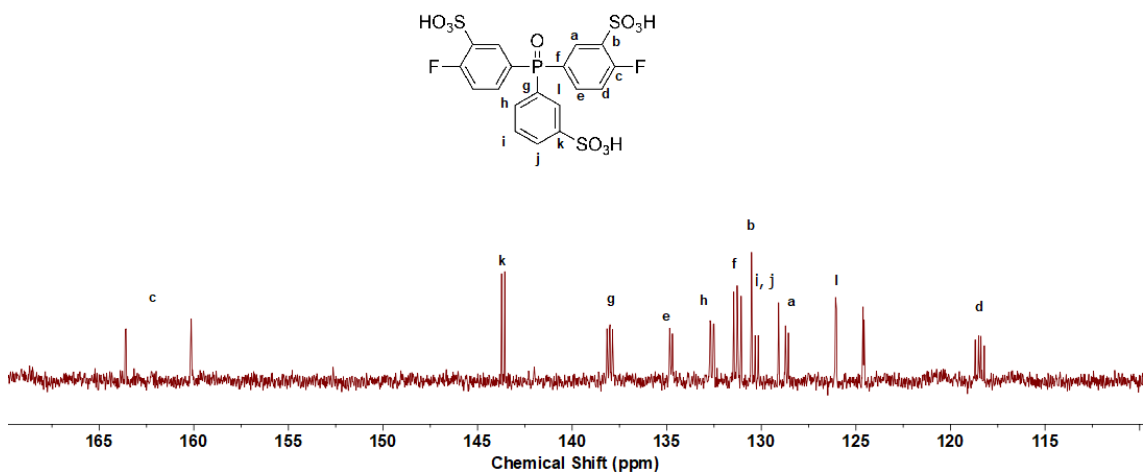

Fig. S 7 <sup>13</sup>C-NMR of sBFPPPO (2) in D<sub>2</sub>O

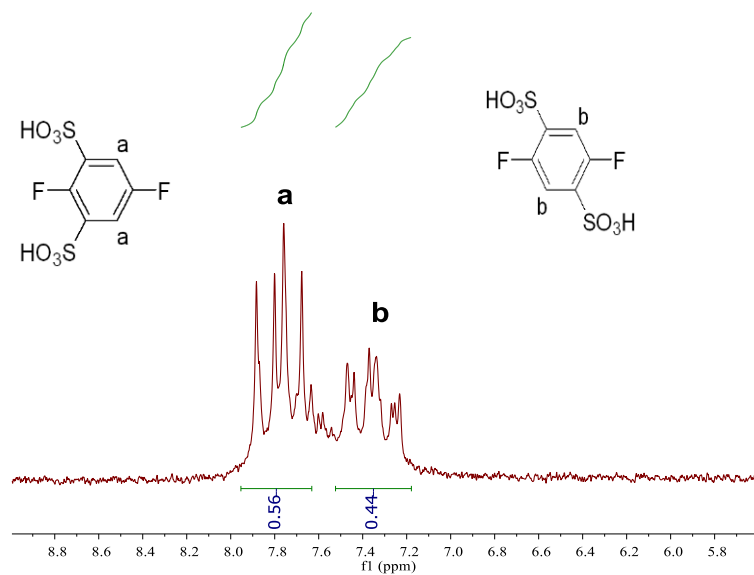

Fig. S 8  $^1\text{H}$  NMR in  $\text{D}_2\text{O}$  of crude mixture of 2,5-difluorobenzene-1,3-disulfonate and 2,5-difluorobenzene-1,4-disulfonate obtained after sulfonation

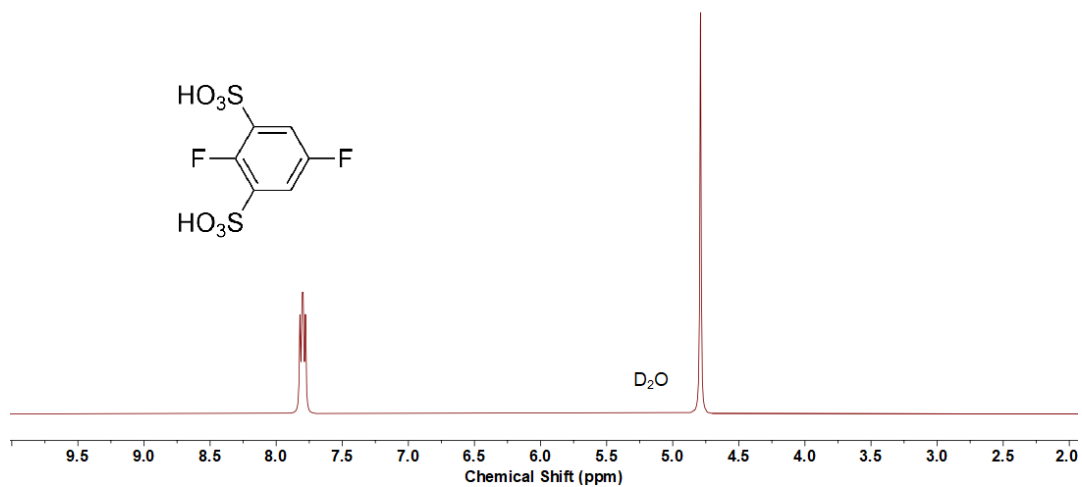

Fig. S 9  $^1\text{H}$  NMR in  $\text{D}_2\text{O}$  of pure 2,5-difluoro-1,3-benzenedisulfonic acid (3)

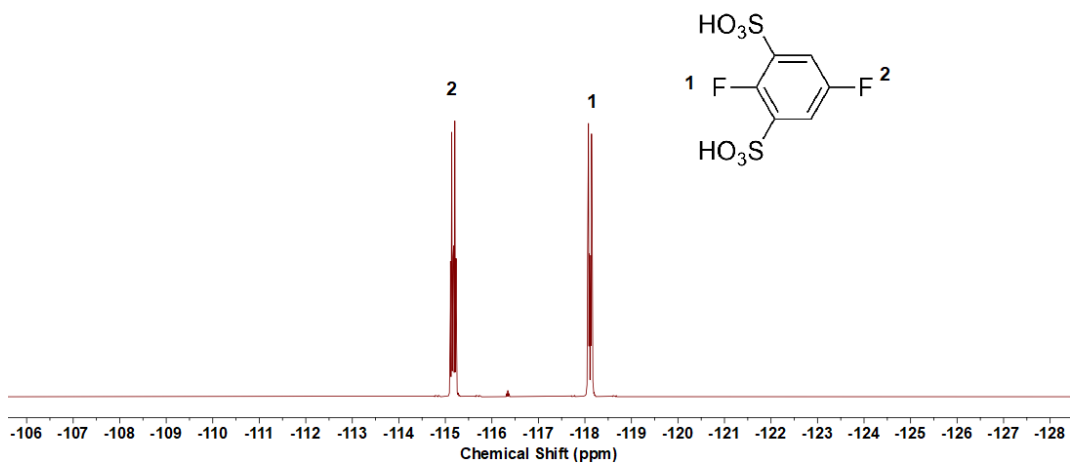

Fig. S 10  $^{19}\text{F}$  NMR in  $\text{D}_2\text{O}$  of pure 2,5-difluoro-1,3-benzenedisulfonic acid (3)

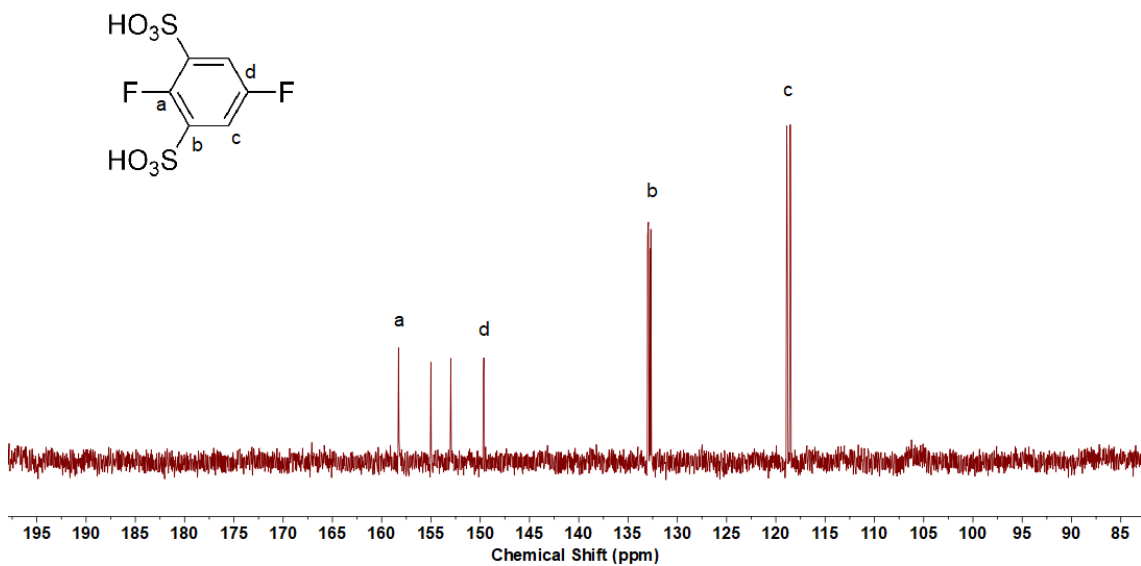

Fig. S 11  $^{13}\text{C}$  NMR in  $\text{D}_2\text{O}$  of pure 2,5-difluoro-1,3-benzenedisulfonic acid (3)

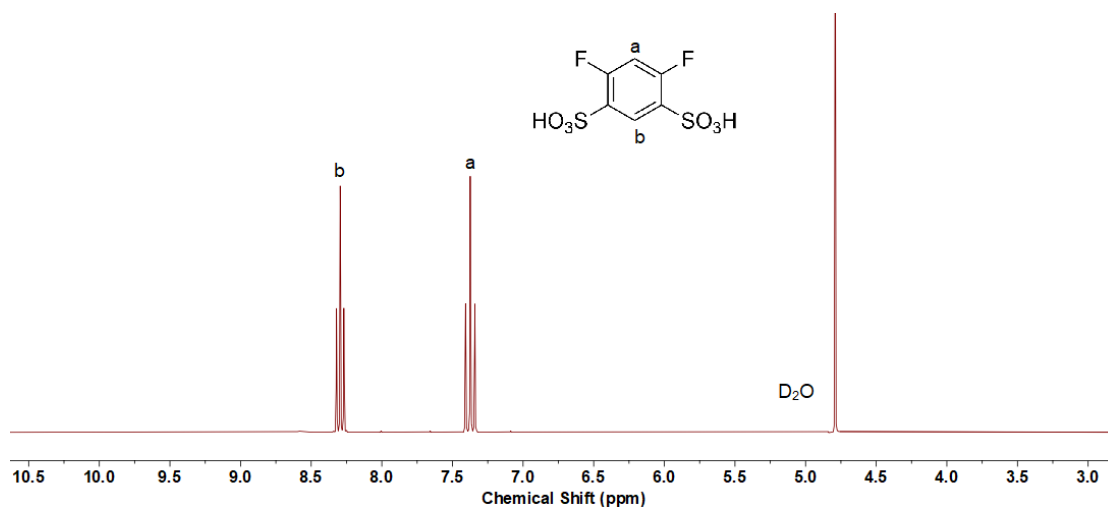

Fig. S 12  $^1\text{H}$  NMR in  $\text{D}_2\text{O}$  of pure 4,6-difluoro-1,3-benzenedisulfonic acid (4)

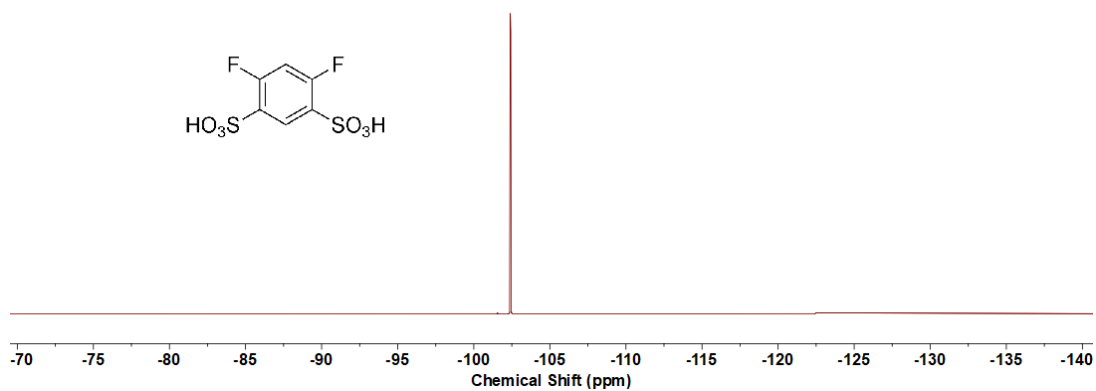

Fig. S 13  $^{19}\text{F}$  NMR in  $\text{D}_2\text{O}$  of pure 4,6-difluoro-1,3-benzenedisulfonic acid (4)

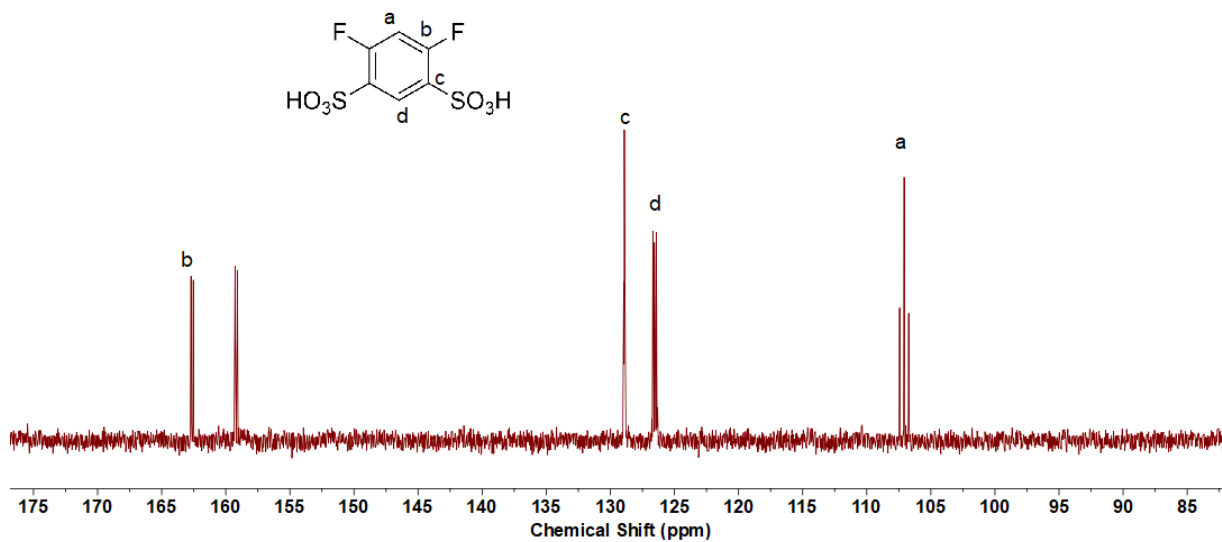

Fig. S 14  $^{13}\text{C}$  NMR in  $\text{D}_2\text{O}$  of pure 4,6-difluoro-1,3-benzenedisulfonic acid (4)

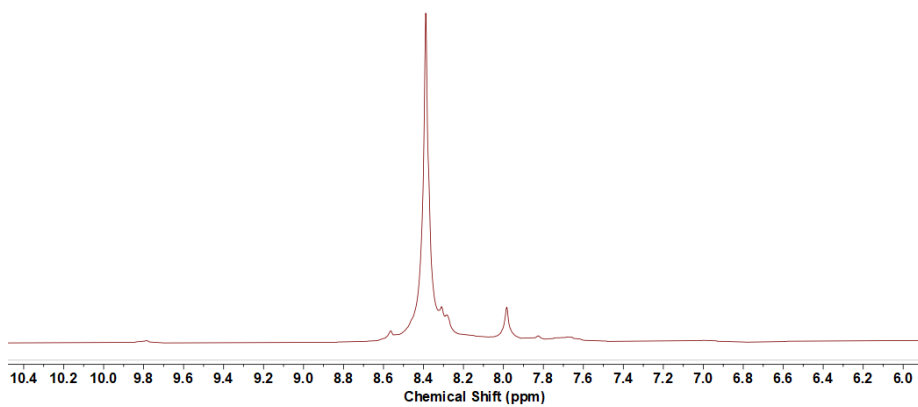

Fig. S 15  $^1\text{H}$  NMR in  $\text{D}_2\text{O}$  of crude product of 1,4-dibromobenzene sulfonation before purification

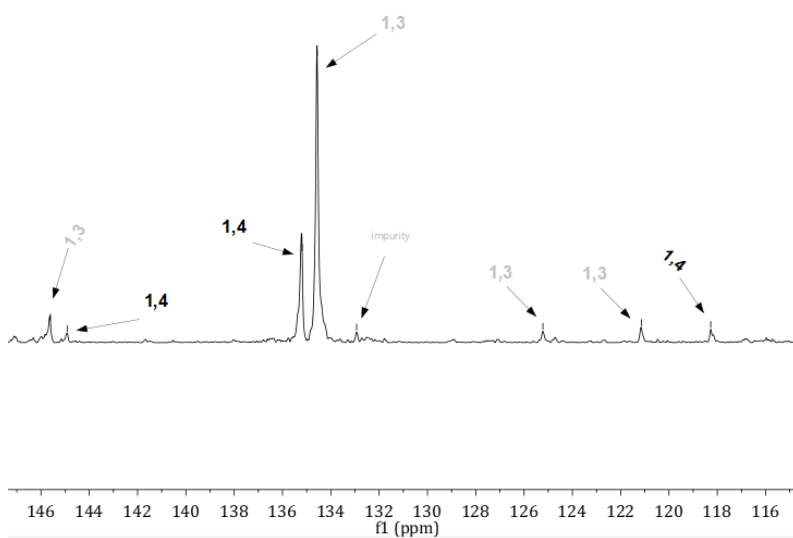

Fig. S 16  $^{13}\text{C}$  NMR in  $\text{D}_2\text{O}$  of crude product of 1,4-dibromobenzene sulfonation before purification

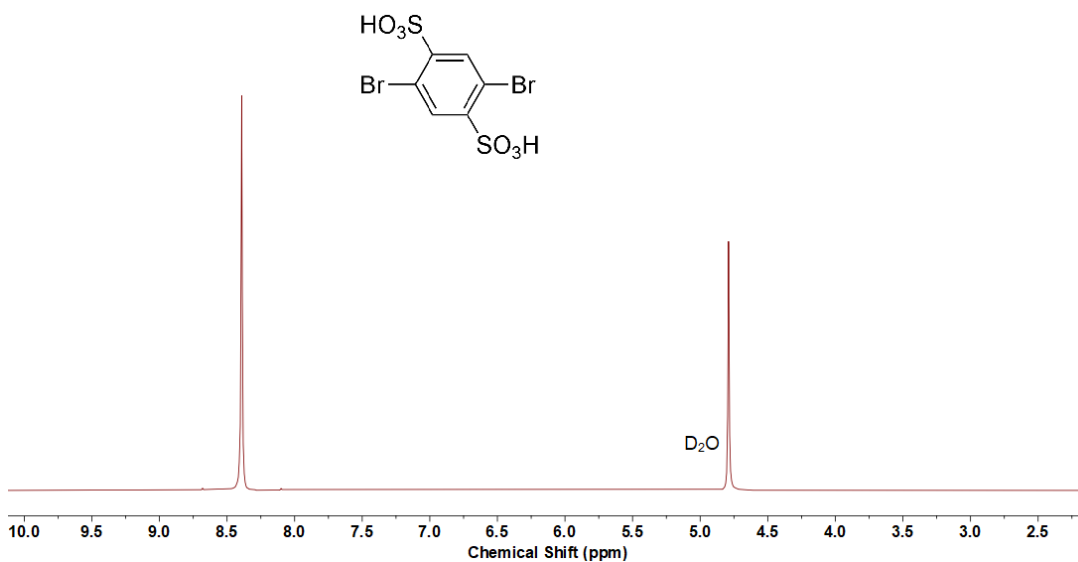

Fig. S 17  $^1\text{H}$  NMR in  $\text{D}_2\text{O}$  of pure 2,5-dibromo-1,4-benzenedisulfonic acid (5)

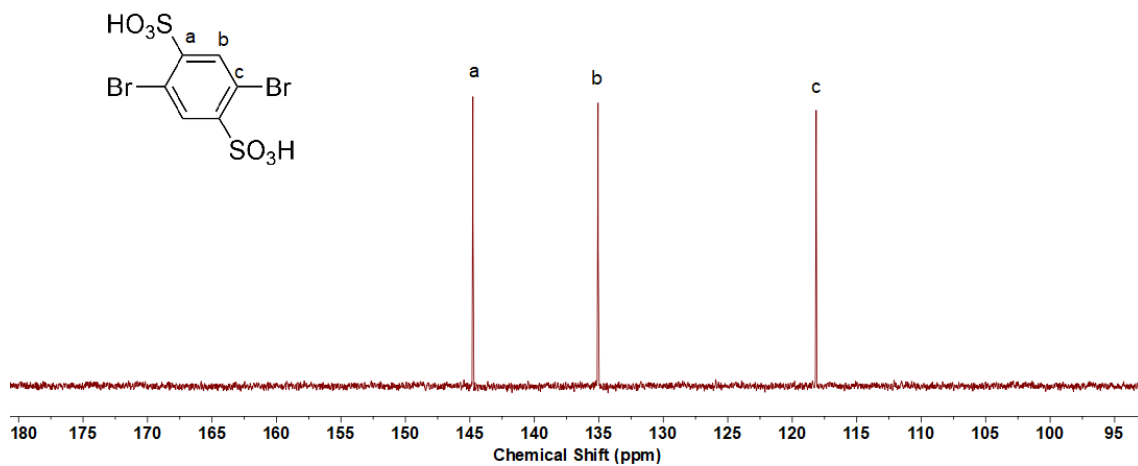

Fig. S 18  $^{13}\text{C}$  NMR in  $\text{D}_2\text{O}$  of pure 2,5-dibromo-1,4-benzenedisulfonic acid (5)

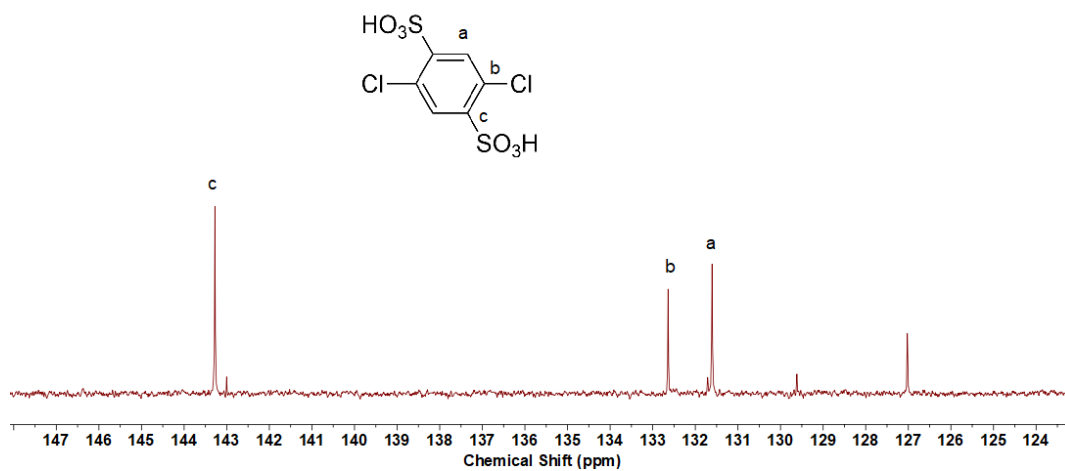

Fig. S 19  $^{13}\text{C}$  NMR in  $\text{D}_2\text{O}$  of the mixture of 2,5-dichlorobenzene-1,4-disulfonate (1,4-ds-2,5-DCB) and 2,5-dichlorobenzene-1,3-disulfonate (1,3-ds-2,5-DCB) (6)



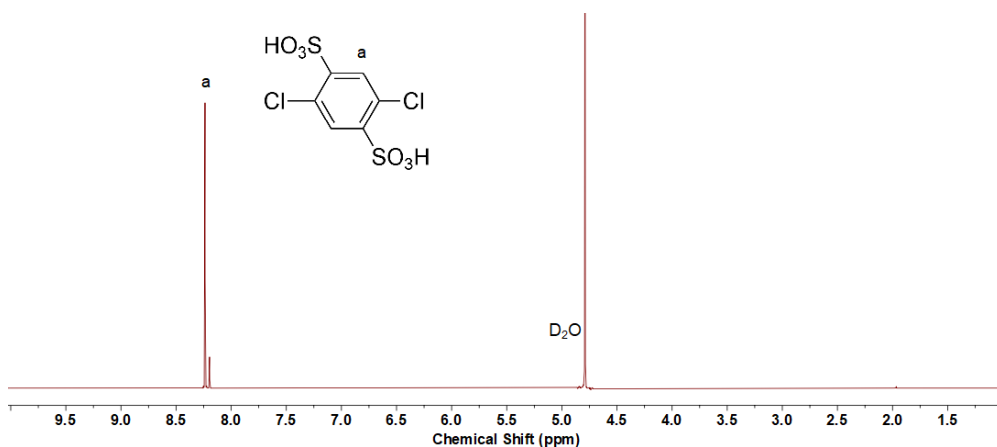

Fig. S 20 <sup>1</sup>H NMR of the mixture of 2,5-dichlorobenzene-1,4-disulfonate (1,4-ds-2,5-DCB) and 2,5-dichlorobenzene-1,3-disulfonate (1,3-ds-2,5-DCB) (6)

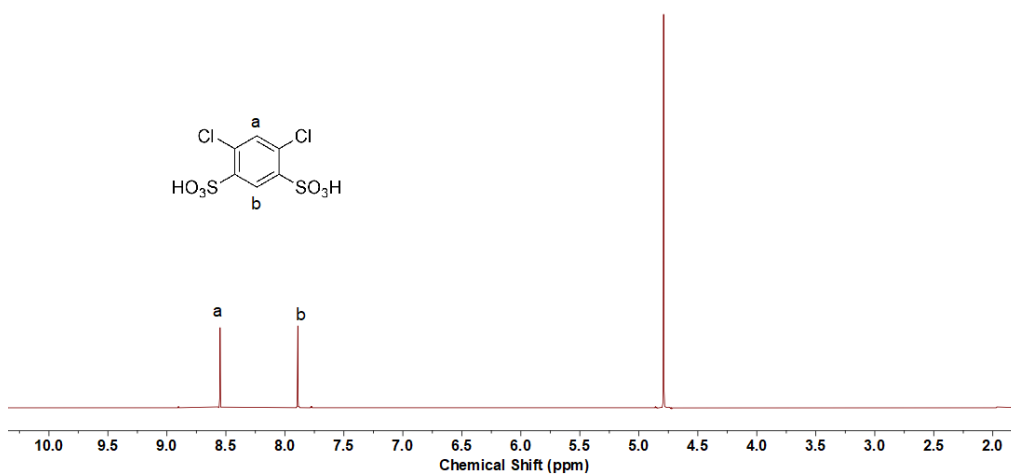

Fig. S 21 <sup>1</sup>H NMR in D<sub>2</sub>O of pure 4,6-dichloro-1,3-benzenedisulfonic acid (7)

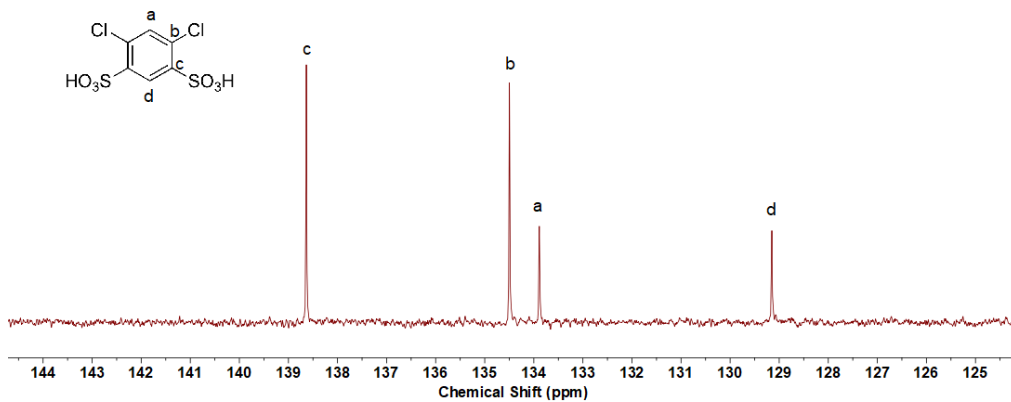

Fig. S 22 <sup>13</sup>C NMR in D<sub>2</sub>O of pure 4,6-dichloro-1,3-benzenedisulfonic acid (7)

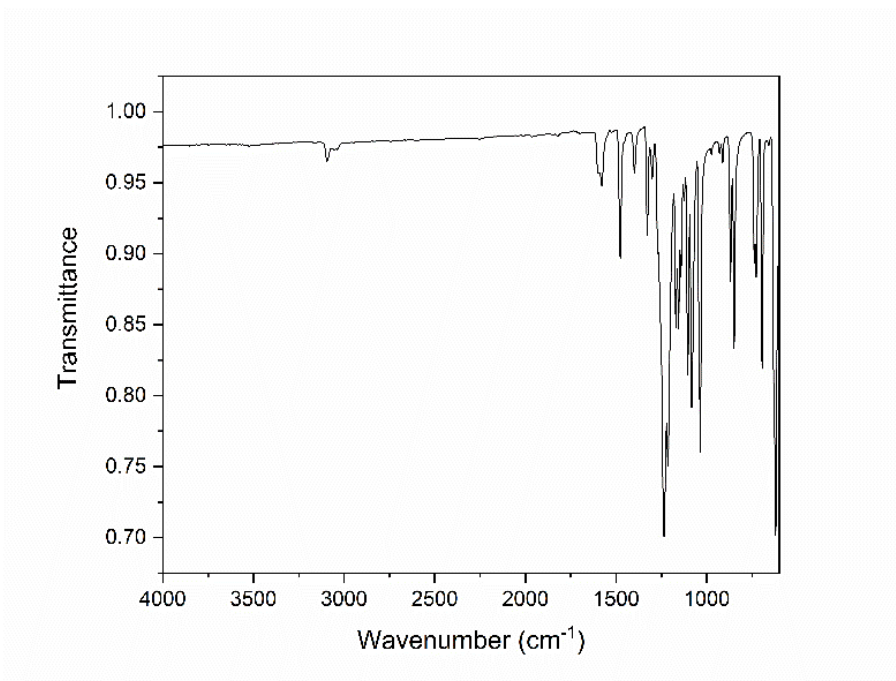

**Fig. S 23** IR spectrum of sDFDPS (1)

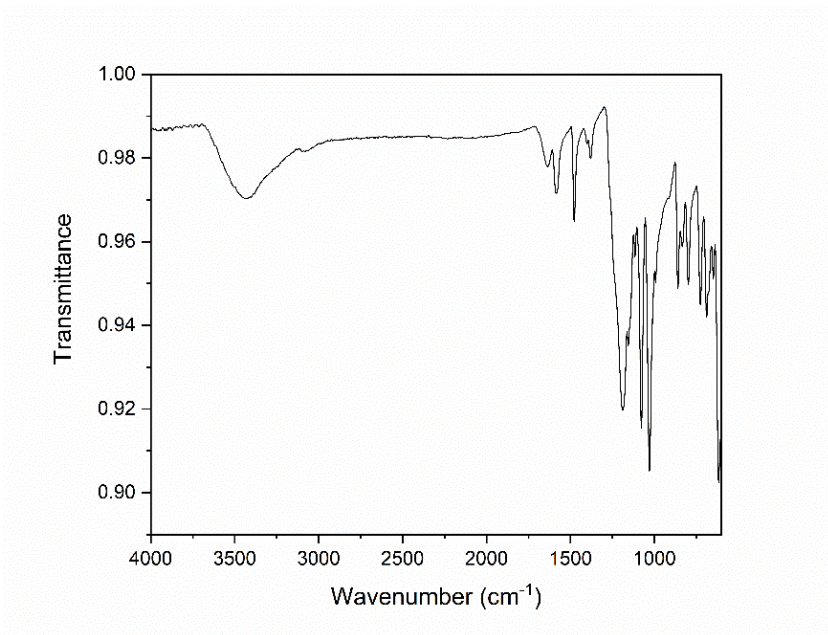

**Fig. S 24** IR spectrum of sBFPPPO (2)

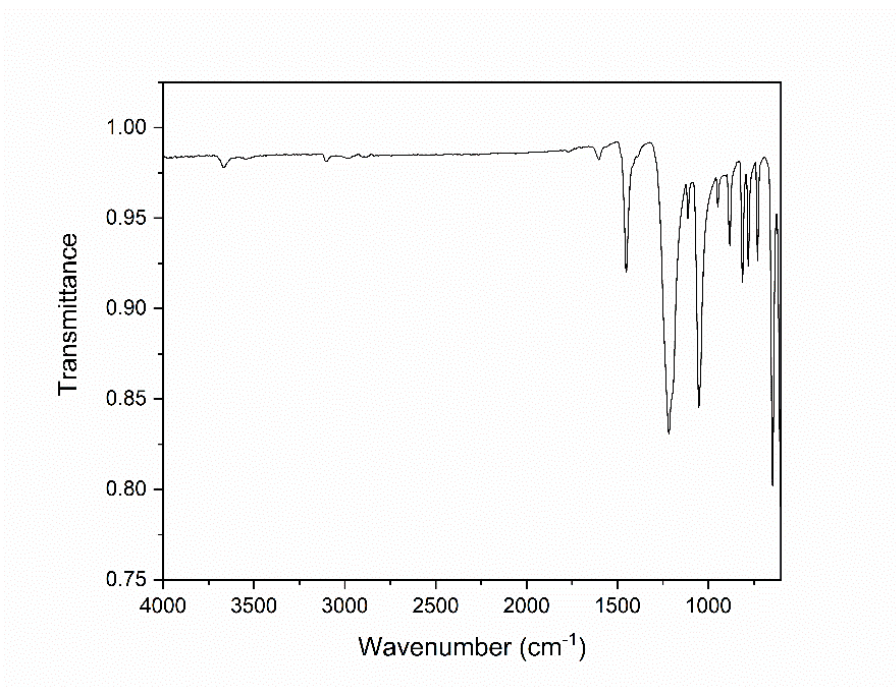

Fig. S 25 IR spectrum of 2,5-difluoro-1,3-benzenedisulfonic acid (3)

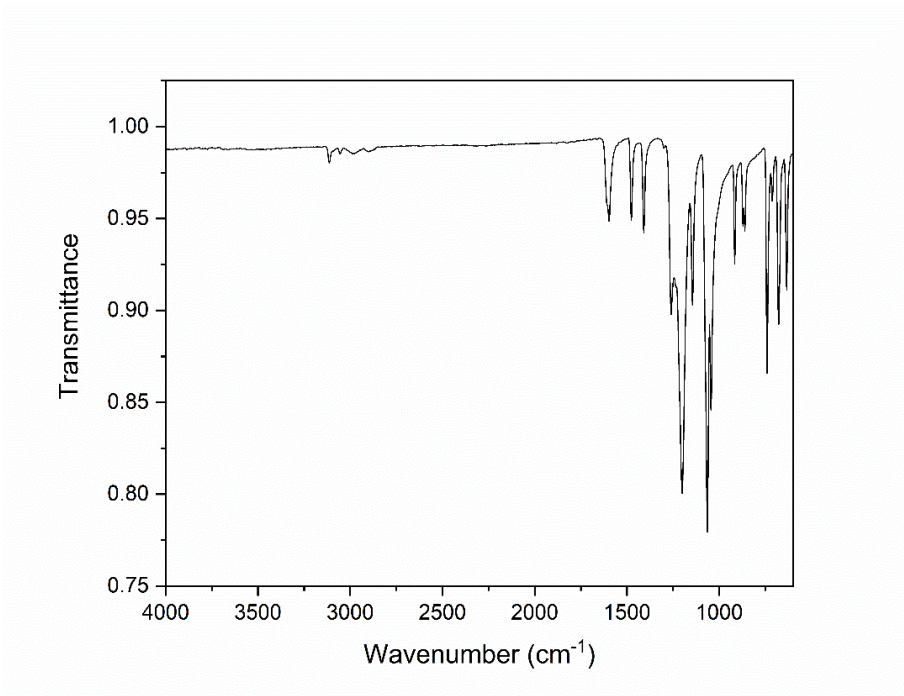

Fig. S 26 IR spectrum of 4,6-difluoro-1,3-benzenedisulfonic acid (4)

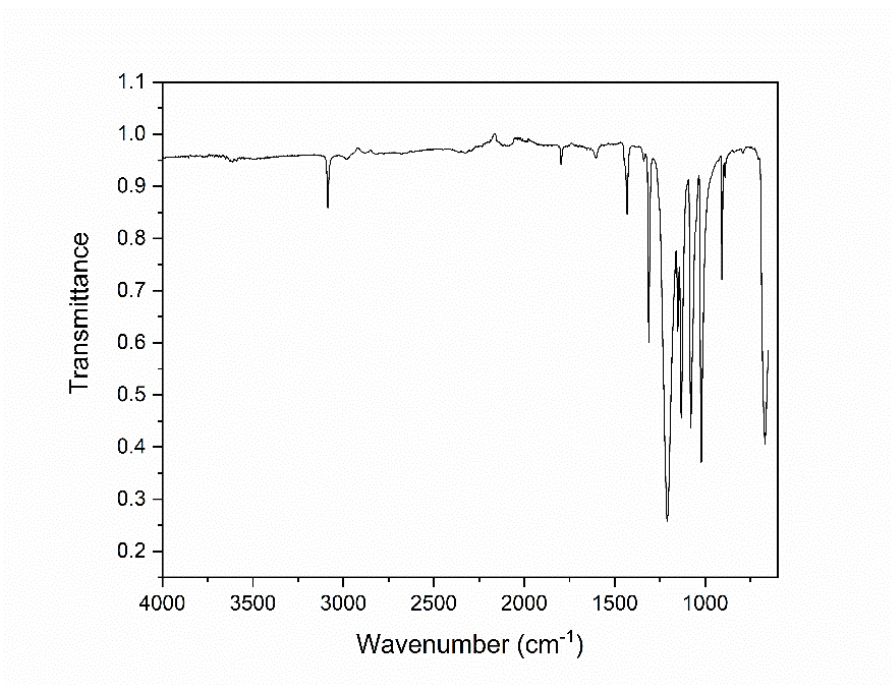

Fig. S 27 IR spectrum of 2,5-dibromo-1,4-benzenedisulfonic acid (5)

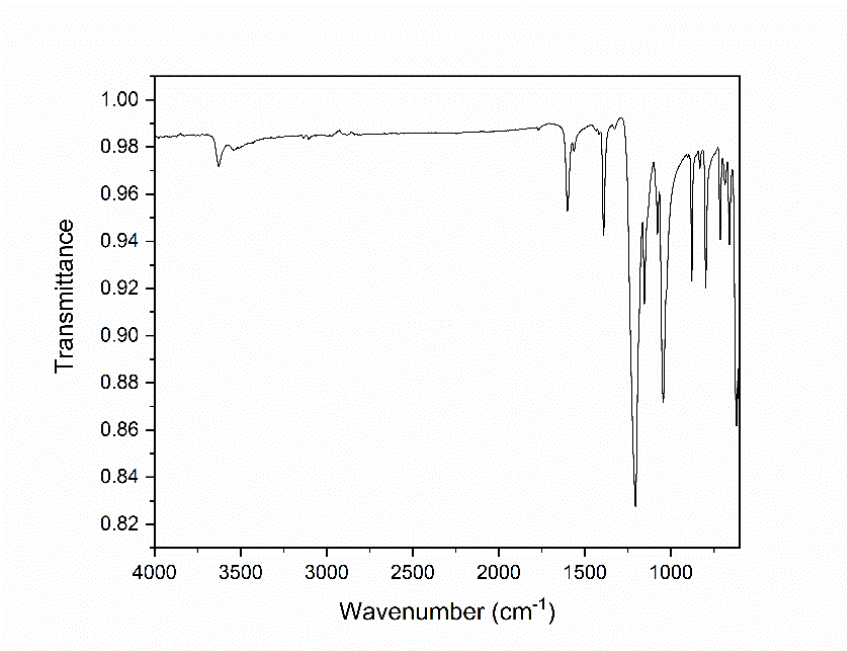

Fig. S 28 IR spectrum of the mixture of 2,5-dichlorobenzene-1,4-disulfonate (1,4-ds-2,5-DCB) and 2,5-dichlorobenzene-1,3-disulfonate (1,3-ds-2,5-DCB) (6)

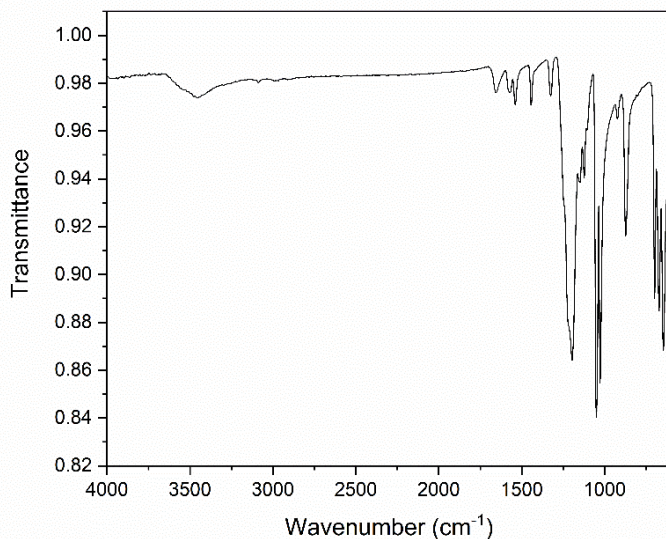

Fig. S 29 IR spectrum of 4,6-dichloro-1,3-benzenedisulfonic acid (7)

### Sulfonation degree cross-verification by acid-base titration

Together with the  $^1\text{H}$  NMR data, the degrees of sulfonation were cross-verified by acid-base titration following this general procedure: aqueous solutions of the sulfonated monomers were passed through an H-form ion-exchange resin twice. Water was removed using a rotary evaporator, followed by drying in a vacuum oven for 96 hours to achieve a constant weight. The dried sample, with a known weight, was then dissolved in water and titrated with 0.1 M NaOH. EW is calculated following the below given equation.

$$\text{EW} = \frac{1000 \cdot m}{V_{\text{NaOH}} \cdot C_{\text{NaOH}}}$$

Where,  $V_{\text{NaOH}}$  — volume of NaOH used for titration (mL),  $C_{\text{NaOH}}$  — molar concentration of NaOH ( $\text{mol} \cdot \text{L}^{-1}$ ),  $m$  — mass of the dried sulfonated monomer in H-form (g)

The obtained equivalent weights closely matched the theoretically expected values (Table S1).

Table S 1. Theoretical and experimental equivalent weights of obtained monomers

| Monomer                           | EW <sub>theor.</sub> | EW <sub>Exp.</sub> |
|-----------------------------------|----------------------|--------------------|
| sDFDPS (1)                        | 207.18               | 207.04             |
| sBFPPO (2)                        | 184.81               | 184.16             |
| ds-1,4-DFB (3)                    | 137.11               | 136.79             |
| ds-1,3-DFB (4)                    | 137.11               | -*                 |
| ds-1,4-DBB (5)                    | 198.01               | 197.83             |
| 1,4-ds-2,5-DCB/1,3-ds-2,5-DCB (6) | 153.56               | 153.22             |
| ds-1,3-DCB (7)                    | 153.56               | -*                 |

\* Titrations for compounds 4 and 7 were omitted due to their high yields and the clarity of the  $^1\text{H}$  NMR spectra.
